# Supplementary material for: In Situ Construction of CNT/CuS Hybrids and Their Application in Photodegradation for Removing Organic Dyes
Source: MDPI journal article supplement (doi:10.3390/nano10010178), 2020-01-20
Supplement: s1 [file s1]

# Supporting Information

## In-situ construction of CNT/CuS hybrids and their promising photodegradation application for removing organic dyes

Yanping Wang <sup>1</sup>, Fuchuan Jiang <sup>1</sup>, Jiafu Chen <sup>2</sup>, Xiaofeng Sun <sup>3</sup>, Tao Xian <sup>3</sup> and Hua Yang <sup>1,\*</sup>

<sup>1</sup> School of Science, Lanzhou University of Technology, Lanzhou 730050, China; wangyanpinglut@163.com (Y.W.); jiangfc\_sir88@163.com (F.J.)

<sup>2</sup> Ministry of Education Key Laboratory of Testing Technology for Manufacturing Process, Southwest University of Science and Technology, Mianyang 621010, China; flyingbanana@yeah.net

<sup>3</sup> College of Physics and Electronic Information Engineering, Qinghai Normal University, Xining 810008, China; sunxf027@126.com (X.S.); 2016105@qhnu.edu.cn (T.X.)

\* Correspondence: hyang@lut.cn; Tel.: +86-931-297-378-3

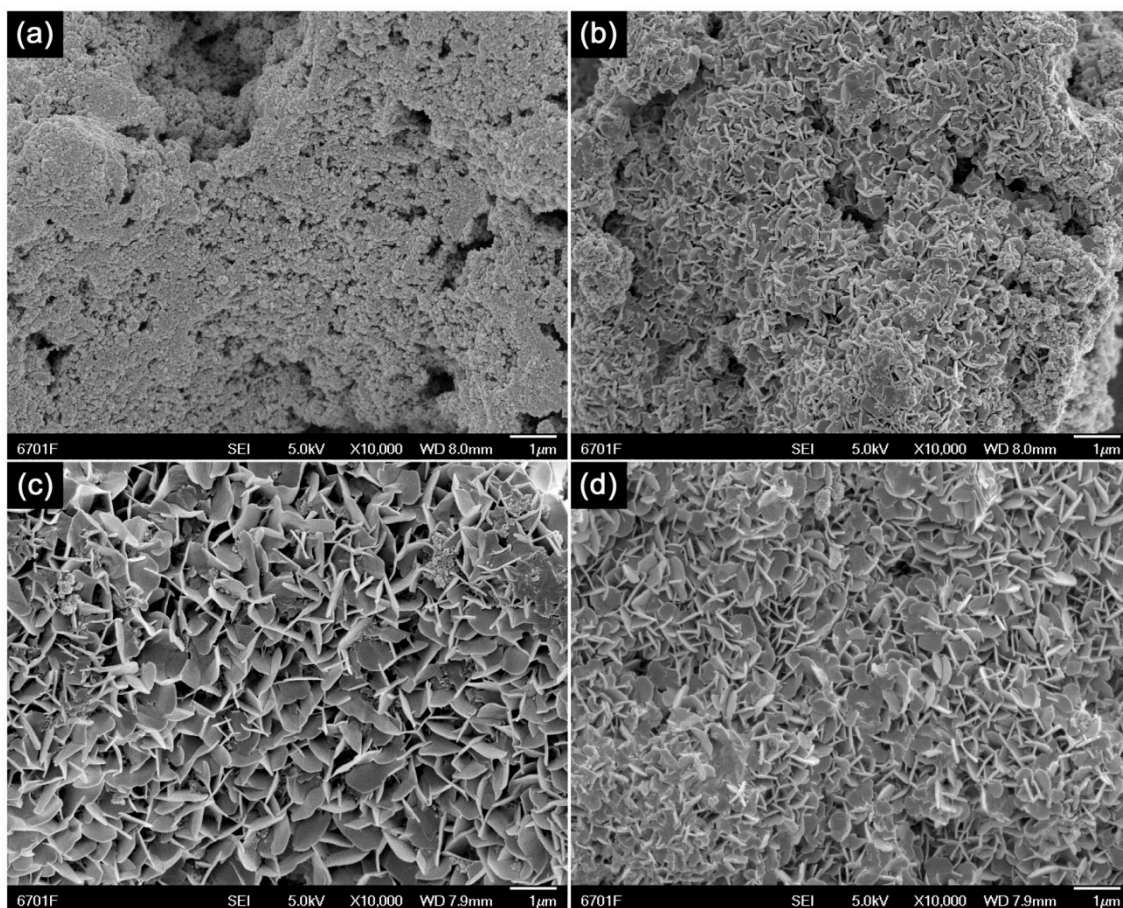

**Figure S1.** SEM images of CuS samples synthesized at 20 °C with different reaction times. (a) 0.5h-20°C, (b) 2h-20°C, (c) 10h-20°C, and (d) 12h-20°C.

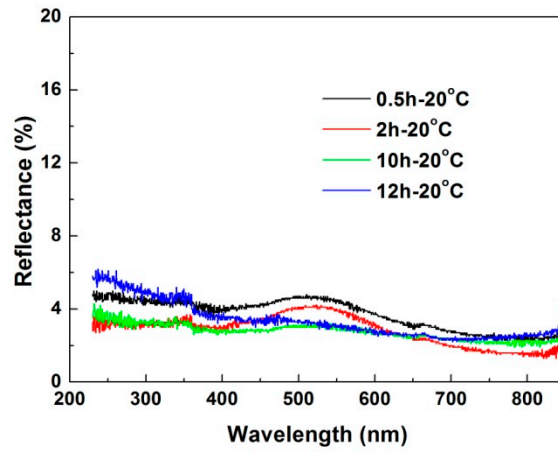

**Figure S2.** Ultraviolet-visible diffuse reflectance spectroscopy (UV-vis DRS) spectra of CuS samples synthesized at 20 °C with different reaction times.

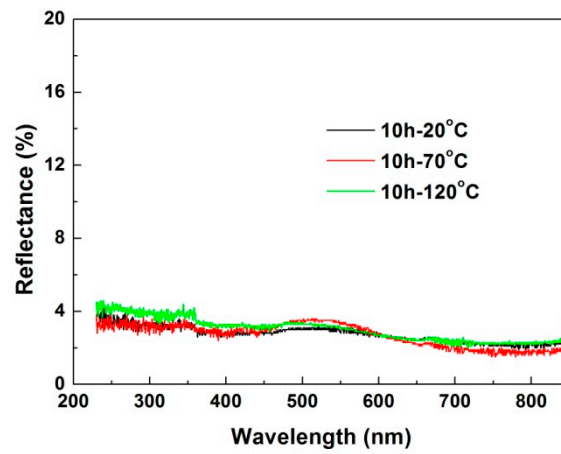

**Figure S3.** UV-vis DRS spectra of CuS samples synthesized at different reaction temperatures for 10 h.

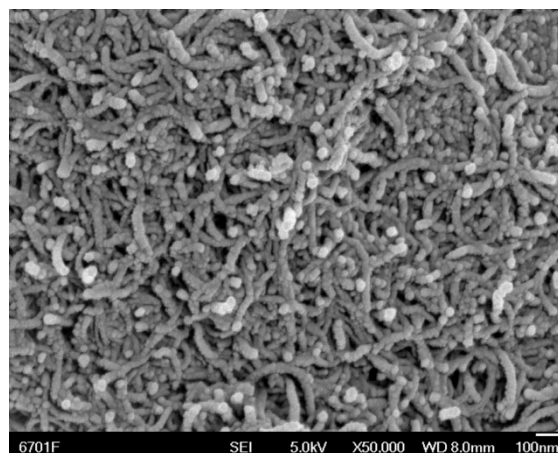

**Figure S4.** SEM image of pure CNTs.

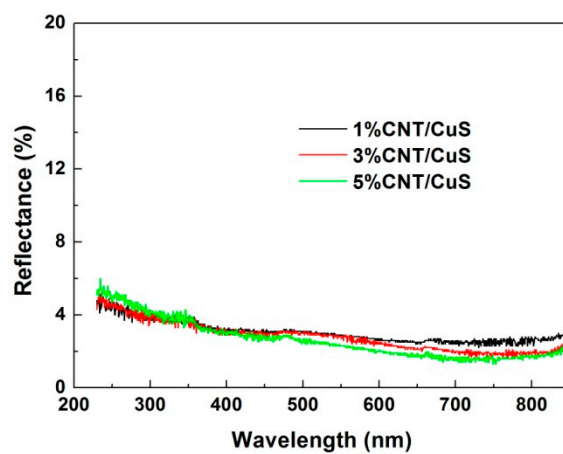

**Figure S5.** UV-vis DRS spectra of the CNT/CuS composites.

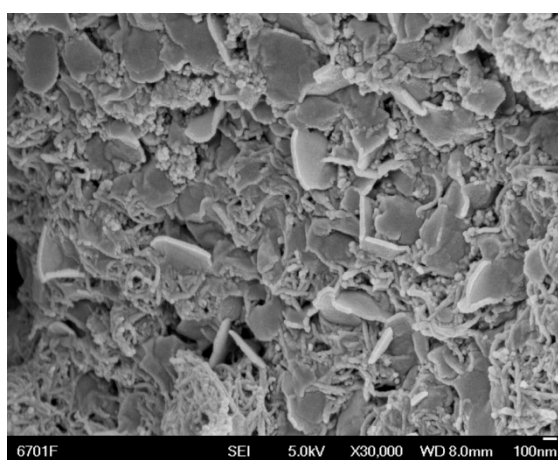

**Figure S6.** SEM image of the 3%CNT/CuS-MD composite obtained by mechanically mixing CuS nanoflakes and CNTs and then drying.
